# Supplementary material
Source: PubMed Central journal article supplement (PMC10922869)
Supplement: NIHMS1967343-supplement-1.pdf [file NIHMS1967343-supplement-1.pdf]

**Supplemental Table.** Clinical characteristics of included and excluded cases

|                                               | Included     | Excluded    |                     |
|-----------------------------------------------|--------------|-------------|---------------------|
| Number                                        | 333          | 119         |                     |
| CAKUT diagnosis                               |              |             | <0.001 <sup>a</sup> |
| Multicystic dysplastic kidney (%)             | 81/333 (24)  | 79/119 (66) |                     |
| Unilateral kidney agenesis (%)                | 47/333 (14)  | 23/119 (19) |                     |
| Kidney hypoplasia (%)                         | 130/333 (39) | 9/119 (8)   |                     |
| Posterior urethral valve (%)                  | 75/333 (22)  | 8/119 (7)   |                     |
| Median gestational age in weeks               | 36.0 (2.4)   | 36.0 (0)    | <0.001 <sup>b</sup> |
| Median birth weight in kg                     | 3.20 (0.91)  | 3.40 (0.88) | 0.046 <sup>b</sup>  |
| Genetic syndrome (%)                          | 51/333 (15)  | 18/119 (15) | 0.96 <sup>a</sup>   |
| Non-kidney anomalies (%)                      | 90/333 (27)  | 15/119 (13) | 0.001 <sup>a</sup>  |
| Mean first eGFR (ml/min/1.73 m <sup>2</sup> ) | 79 ± 44      | 103 ± 40    | <0.001 <sup>c</sup> |
| Mean KL:BL                                    | 8.2 ± 2.1    | 9.6 ± 1.7   | <0.001 <sup>c</sup> |
| aCAKUT (%)                                    | 135/333 (41) | 33/119 (28) | 0.01 <sup>a</sup>   |

<sup>a</sup>Proportion and percentage in parentheses with differences analyzed by Pearson's Chi-square test, <sup>b</sup>median with interquartile range in parentheses with differences analyzed by Mann-Whitney U test, <sup>c</sup>mean ± standard deviation with differences analyzed by Student's t-test. CAKUT= congenital anomaly of the kidney and urinary tract, eGFR = estimated glomerular filtration rate in ml/min/1.73 m<sup>2</sup>, KL:BL = average kidney length:body length\*100, aCAKUT = kidney or urinary tract malformation in addition to primary diagnosis.
